# Supplementary material for: The Perceived Impact of Suicide Bereavement on Specific Interpersonal Relationships: A Qualitative Study of Survey Data
Source: PubMed Central journal article supplement (PMC6572476; doi:10.3390/ijerph16101801), 2019-05-21
Supplement: ijerph-16-01801-s001.pdf [file ijerph-16-01801-s001.pdf]

**Table S1.** Distribution of themes by relationship type.

|                                                                   |   | <b>Partner</b> | <b>Close friends</b> | <b>Close family</b> | <b>Wider family</b> | <b>General relationships</b> | <b>Total responses coded under any of the 5 relationship categories</b> |
|-------------------------------------------------------------------|---|----------------|----------------------|---------------------|---------------------|------------------------------|-------------------------------------------------------------------------|
| <b>Themes</b>                                                     |   |                |                      |                     |                     |                              |                                                                         |
| Social discomfort over the death                                  | n | 11             | 50                   | 43                  | 25                  | 14                           | 143                                                                     |
|                                                                   | % | 8%             | 35%                  | 30%                 | 17%                 | 10%                          | 100%                                                                    |
| Social withdrawal                                                 | n | 63             | 106                  | 27                  | 0                   | 76                           | 272                                                                     |
|                                                                   | % | 23%            | 39%                  | 10%                 | 0%                  | 28%                          | 100%                                                                    |
| Shared bereavement experience creating closeness versus avoidance | n | 4              | 73                   | 36                  | 7                   | 23                           | 143                                                                     |
|                                                                   | % | 3%             | 51%                  | 25%                 | 5%                  | 16%                          | 100%                                                                    |
| Attachments influenced by a fear of further losses                | n | 58             | 22                   | 74                  | 10                  | 22                           | 186                                                                     |
|                                                                   | % | 31%            | 12%                  | 40%                 | 5%                  | 12%                          | 100%                                                                    |

The numerator represents the number of responses coded under that theme in relation to that specific relationship. The denominator (final column) represents the total number of responses coded under that theme for all relationship categories.
